# Supplementary material for: Systematic review of economic burden of heart failure
Source: Springer Nature journal article supplement (doi:10.1007/s10741-017-9661-0), 2017-11-10
Supplement: MOESM3 [file 15213442]

**Table 2 Characteristics of the studies included**

| **Author** | **Country** | **Definition of disease stage (data source of diagnosis)** | **Perspective** | **Cost Disaggregation** | **Costing Approach** | | | **Source of utilization data** | **Cost (Int$)** |
| --- | --- | --- | --- | --- | --- | --- | --- | --- | --- |
| **Epidemiological approach** | **Top down or bottom up** | **Retrospective or prospective** |
| Whellan et al., 2010 (43) | United States | Hospitalization due to primary  diagnosis of heart failure (claim database) | none | No | prevalence | bottom up | retrospective | Medicare claim database | 2,496 per year per person |
| Hauptman et al., 2008 (44) | United States | Hospitalization due to primary  diagnosis of heart failure (healthcare database) | none | Partial | prevalence | bottom up | retrospective | national healthcare database with DRG billing | 22,318 per hospitalization |
| Dunlay et al., 2011 (45) | United States | heart failure diagnosis (community healthcare database) | none | Yes | incidence | bottom up | retrospective | community healthcare database | Lifetime cost 83,933 per person |
| Wang et al., 2010 (46) | United States | hospitalization due to heart failure as primary & secondary diagnosis (claim database) | none | Partial | prevalence | bottom up | retrospective | MarketScan Commercial Claims and Encounters inpatient data set | 25,054 per hospitalization |
| Corrao et al., 2014 (47) | Italy | hospitalization due to heart failure (community healthcare database) | health-care payer | Yes | prevalence | bottom up | retrospective | community healthcare database | 11,036 per year per person |
| Voigt et al., 2014 (48) | United States | Either as heart failure in isolation or as one of comorbid illness (official data) | none | Yes | prevalence | bottom up | retrospective | national healthcare database | Heart failure in isolation = 74.46 billion (annual population estimate)  Heart failure syndrome = 129.79 billion (annual population estimate) |
| Bogner et al., 2010 (49) | United States | primary or secondary diagnoses of heart failure (community administrative database) | large health care system | Yes | prevalence | bottom up | retrospective | Medicare claims database | 40,971 per year per person |
| Joshi et al., 2004 (50) | United States | Hospitalization due to heart failure (national database) | none | No | prevalence | bottom up | retrospective | national healthcare database | 14,648 per hospitalization |

***DRG Diagnosis-related Group***

**Table 2 Characteristics of the studies included (continued)**

| **Author** | **Country** | **Definition of disease stage (data source of diagnosis)** | **Perspective** | **Cost Disaggregation** | **Costing Approach** | | | **Source of utilization data** | **Cost (Int$)** |
| --- | --- | --- | --- | --- | --- | --- | --- | --- | --- |
| **Epidemiological approach** | **Top down or bottom up** | **Retrospective or prospective** |
| Claes et al., 2008 (51) | Belgium | primary or secondary diagnoses of heart failure | not stated | Yes | prevalence | bottom up | retrospective | national healthcare database | 4,169 per hospitalization |
| Bharmal et al., 2008 (52) | United States | Hospitalization due to heart failure (Medicare database) | societal | No | prevalence | bottom up | retrospective | Medicare databse | 39,837 per year per person |
| Korves et al., 2012 (53) | United States | Chronic heart failure, primary & secondary diagnosis | not stated | No | prevalence | bottom up | retrospective | insurance claim database | <65 years old = 34,233 per hospitalization, >65 years old = 13,712 per hospitalization |
| Lagu et al., 2013 (54) | United States | Hospitalization due to heart failure (national database) | none | no | prevalence | bottom up | retrospective | national healthcare database | 6,807 per hospitalization |
| Ziaeian et al., 2015 (55) | United States | Hospitalization due to heart failure (national database) | none | No | prevalence | bottom up | retrospective | national healthcare database | 11,340 per hospitalization |
| Czech et al., 2013 (56) | Poland | heart failure diagnosis (questionnaires) | public payer | Yes | prevalence | bottom up | retrospective | Published studies | 11,489 per year per person |
| Wijeysundera et al., 2014 (57) | Canada | Hospitalization due to heart failure (national database) | Ministry of Health | no | prevalence | bottom up | retrospective | national healthcare database | 24,588 per year per person |
| Stålhammar et al., 2013 (58) | Sweden | Hospitalization due to heart failure (electronic medical records of primary care centers, national registries) | none | yes | prevalence | bottom up | retrospective | national registries | 84,434 per year per person |
| Kuwabara et al., 2010 (59) | Japan | Either as acute heart failure or chronic heart failure (national database) | none | No | prevalence | bottom up | retrospective | national healthcare database | acute heart failure = 13,999 per year per person  chronic heart failure = 12,444 per year per person |
| Sözmen et al., 2014 (60) | Turkey | Hospitalization due to heart failure (Hospital data) | Social Security Institution | Yes | prevalence | bottom up | retrospective | hospital databases | 3,780 per hospitalization |

**Table 2 Characteristics of the studies included (continued)**

| **Author** | **Country** | **Definition of disease stage (data source of diagnosis)** | **Perspective** | **Cost Disaggregation** | **Costing Approach** | | | **Source of utilization data** | **Cost (Int$)** |
| --- | --- | --- | --- | --- | --- | --- | --- | --- | --- |
| **Epidemiological approach** | **Top down or bottom up** | **Retrospective or prospective** |
| Neumann et al., 2009 (61) | German | heart failure diagnosis (official statistic) | none | Partial | prevalence | top down | retrospective | Official Statistic | 3,215 million (annual population estimate) |
| Tatari et al., 2015 (62) | Lebanon | primary or secondary diagnoses of heart failure (registry data) | none | Yes | prevalence | bottom up | retrospective | Registry data & Survey | 4,826 per year per person |
| Agvall et al., 2005 (63) | Sweden | heart failure diagnosis (patient record) | none | Yes | prevalence | bottom up | retrospective | Patient Record | 35,797 per year per person |
| Ogah et al., 2014 (64) | Nigeria | heart failure diagnosis (patient record) | societal | Yes | prevalence | bottom up | retrospective | Patient Record | 2,612 per year per person |
| Mejhert et al., 2013 (65) | Sweden | NYHA class II–IV (clinical trial) | none | Yes | incidence | bottom up | prospective | Official Statistic-National Board of Health and Welfare | 31,780 per person over 8-12 years |
| Biermann et al., 2012 (66) | German | NYHA 1-IV, LVEF<50% (published studies) | societal | Partial | prevalence | bottom up | retrospective | Published studies | 3,092 per year per person |
| Russo et al., 2008 (67) | United States | advanced heart failure and ESHF (NYHA IV) (clinical trial data) | none | Yes | incidence | bottom up | retrospective | Medicare claim database | 171,715 per person over final 2 years of life |
| Peters-Klimm et al., 2012 (68) | German | heart failure diagnosis (clinical trial) | health-care payer | Yes | prevalence | bottom up | retrospective | Clinical trial data collection form | 5,829 per year per person |
| Araujo et al. 2005 (69) | Brazil | ACC/AHA Stage C & D (questionnaires) | societal | Yes | prevalence | bottom up | retrospective | Patient Record | 60,448 per year per person |

***ACCA/AHA*** ***American College of Cardiology/American Heart Association;*** ***ESHF End-Stage Heart Failure; LVEF Left Ventricular Ejection Fraction; NYHA New York Heart Association; NYHA New York Heart Association***

**Table 2 Characteristics of the studies included (continued)**

| **Author** | **Country** | **Definition of disease stage (data source of diagnosis)** | **Perspective** | **Cost Disaggregation** | **Costing Approach** | | | **Source of utilization data** | **Cost (Int$)** |
| --- | --- | --- | --- | --- | --- | --- | --- | --- | --- |
| **Epidemiological approach** | **Top down or bottom up** | **Retrospective or prospective** |
| Delgado et al., 2014 (70) | Spain | ACC/AHA Stage C & D , NYHA 1-IV (observational study) | societal | Yes | prevalence | bottom up | prospective | Clinical trial data collection form | 14,846 per year per person |
| Titler et al,. 2008 (71) | United States | Hospitalization due to primary or secondary d heart  failure. (Patient record) | none | yes | prevalence | bottom up | retrospective | hospital databases | 19,886 per hospitalization |
| Joo et al., 2014 (72) | United States | self-identified (questionnaires) | none | Yes | prevalence | bottom up | retrospective | Published studies | 908 per year per person |
| Parissis et al., 2015 (73) | Greece | hospitalization due to heart failure (patient record) | third party-payer | Yes | prevalence | bottom up | retrospective | Patient Record | 3,797 per hospitalization per person |
| Ondrackova et al., 2009 (74) | Czech Republic | hospitalization due to CDHF & De Novo heart failure (registry data) | health-care payer | Yes | prevalence | bottom up | retrospective | hospital billing database | 6,454 per year per person |
| Liao et al., 2007 (75) | United States | Hospitalization, self-report, physician diagnosis (expert panel) | none | Yes | incidence | bottom up | retrospective | observational study | incident HF- 384,040 per patient over 10 years, prevalent HF- 64,239 per patient over 10 years |
| Rihova et al., 2013 (76) | Czech Republic | hospitalization due to CDHF & De Novo heart failure (registry data) | health-care payer | Yes | prevalence | bottom up | retrospective | Registry data | 4,847 per year per person |
| Liao et al., 2006 (77) | United States | Hospitalization, self report, physicain diagnosis (expert panel) | none | No | incidence | bottom up | retrospective | observational study | incident HF- 130,236 per patient over 5 years, prevalent HF- 90,191 per patient over 5 years |

***ACCA/AHA*** ***American College of Cardiology/American Heart Association; CDHF Chronic Decompensated Heart Failure; NYHA New York Heart Association***
